# Supplementary material for: Controlling the emission efficiency of blue-green iridium(iii) phosphorescent emitters and applications in solution-processed organic light-emitting diodes
Source: Royal Society of Chemistry journal article supplement (doi:10.1039/c6tc02909d), 2016-01-01
Supplement: c6tc02909d1.pdf [file c6tc02909d1.pdf]

## Controlling the emission of blue-green Iridium (III) phosphorescent emitters

Muhammad T. Sajjad,<sup>a</sup> Nidhi Sharma,<sup>a,b</sup> Amlan K. Pal,<sup>b</sup> Kamrul Hasan,<sup>c,d</sup> Guohua Xie,<sup>a</sup> Lisa Sophie Kölln,<sup>a</sup> Garry S. Hanan,<sup>\*c</sup> Ifor D. W. Samuel,<sup>\*a</sup> Eli Zysman-Colman<sup>\*b</sup>

<sup>a</sup> Organic Semiconductor Centre, SUPA, School of Physics and Astronomy, University of St. Andrews, St. Andrews, Fife, KY16 9SS, UK; *Tel:* +44-1334 463114;  
*E-mail:* [ids@st-andrews.ac.uk](mailto:ids@st-andrews.ac.uk)

<sup>b</sup> Organic Semiconductor Centre, EaStCHEM School of Chemistry, University of St Andrews, St Andrews, Fife, UK, KY16 9ST, *Fax:* +44-1334 463808; *Tel:* +44-1334 463826;  
*E-mail:* [eli.zysman-colman@st-andrews.ac.uk](mailto:eli.zysman-colman@st-andrews.ac.uk); *URL:* <http://www.zysman-colman.com>

<sup>c</sup> Département de Chimie, Université de Montréal, 2900 Edouard-Montpetit, Montréal, Québec H3T-1J4, Canada.  
*E-mail:* [garry.hanan@umontreal.ca](mailto:garry.hanan@umontreal.ca); *Fax:* +1-514 343-2468; *Tel:* +1-514 343-7056

<sup>d</sup> Department of Chemistry, College of Sciences, University of Sharjah, P. O. Box 27272, Sharjah, United Arab Emirates  
*E-mail:* [khasan@sharjah.ac.ae](mailto:khasan@sharjah.ac.ae); *Fax:* +971 6 5053820; *Tel:* +971 6 5166768

### SUPPORTING INFORMATION

#### Table of contents

|                                                                                                       | <b>Pages</b> |
|-------------------------------------------------------------------------------------------------------|--------------|
| <sup>1</sup> H, <sup>19</sup> F and <sup>13</sup> C NMR spectra of individual compounds and complexes | S2-S9        |
| Photophysical characterisation                                                                        | S10-S11      |
| DFT calculations                                                                                      | S12-S20      |
| OLED Device Fabrication                                                                               | S20          |

# $^1\text{H}$ , $^{19}\text{F}$ and $^{13}\text{C}$ NMR spectra of individual compounds and complexes

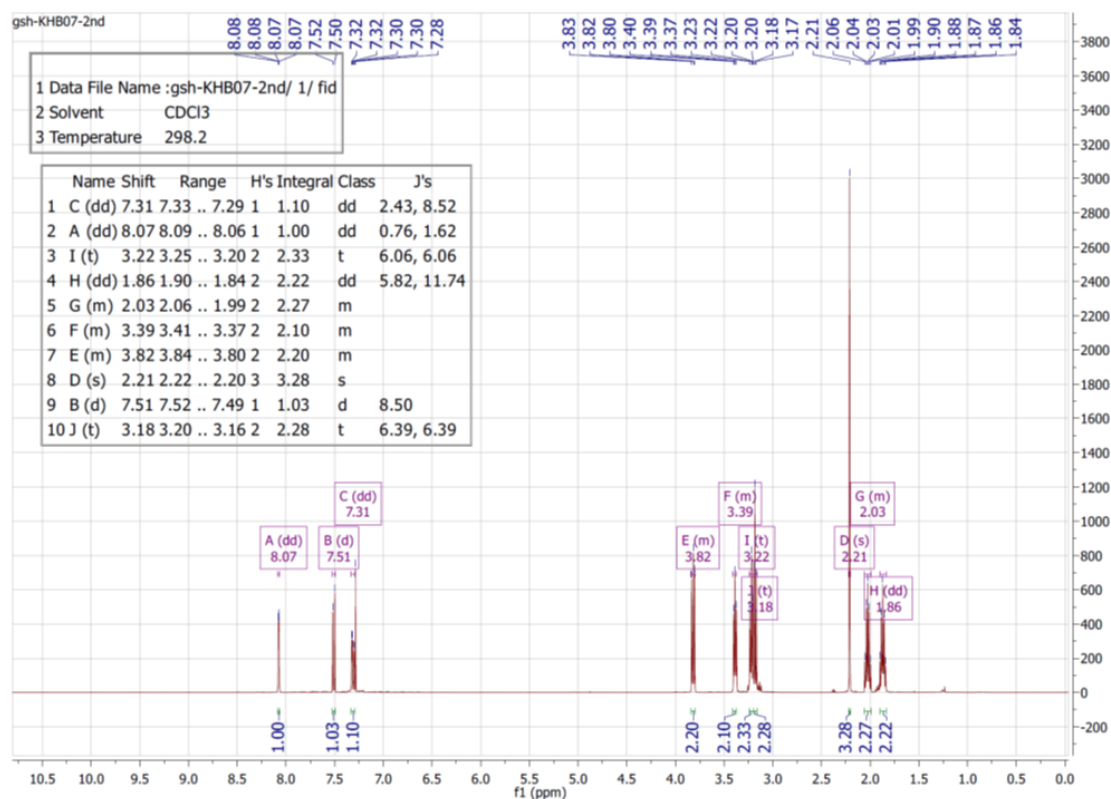

Figure S1.  $^1\text{H}$  NMR spectrum of L1 (**Me-gpy**) in CDCl<sub>3</sub> at 400 MHz.

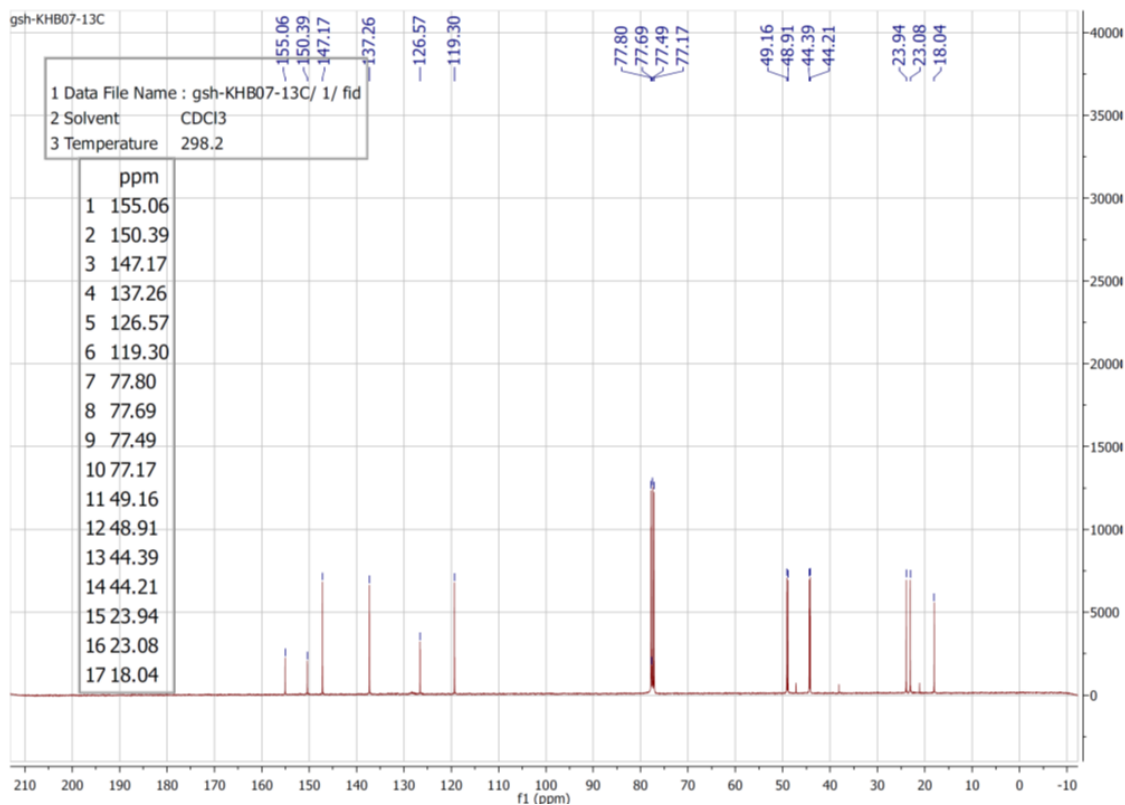

Figure S2.  $^{13}\text{C}$  NMR spectrum of L1 (**Me-gpy**) in CDCl<sub>3</sub> at 400 MHz.

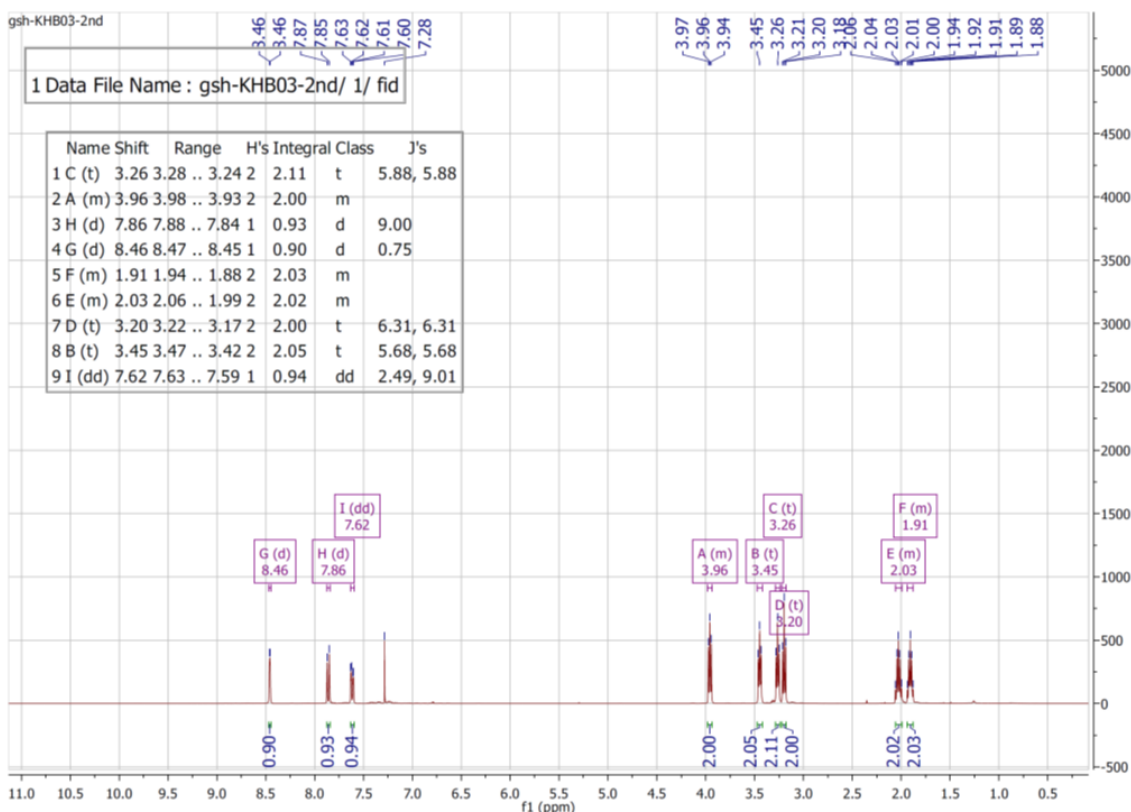

Figure S3.  $^1\text{H}$  NMR spectrum of **L2** ( $\text{CF}_3\text{-gpy}$ ) in  $\text{CDCl}_3$  at 400 MHz at r.t.

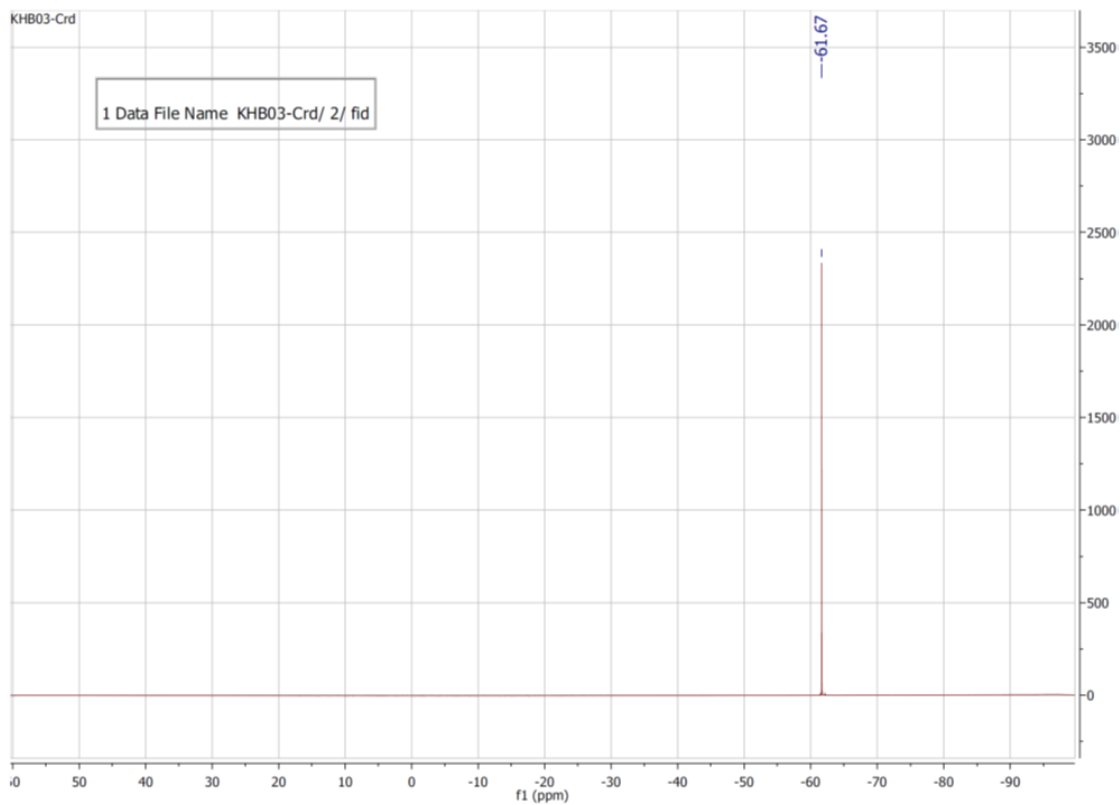

Figure S4.  $^{19}\text{F}$  NMR spectrum of **L2** ( $\text{CF}_3\text{-gpy}$ ) in  $\text{CDCl}_3$  at 400 MHz at r.t.

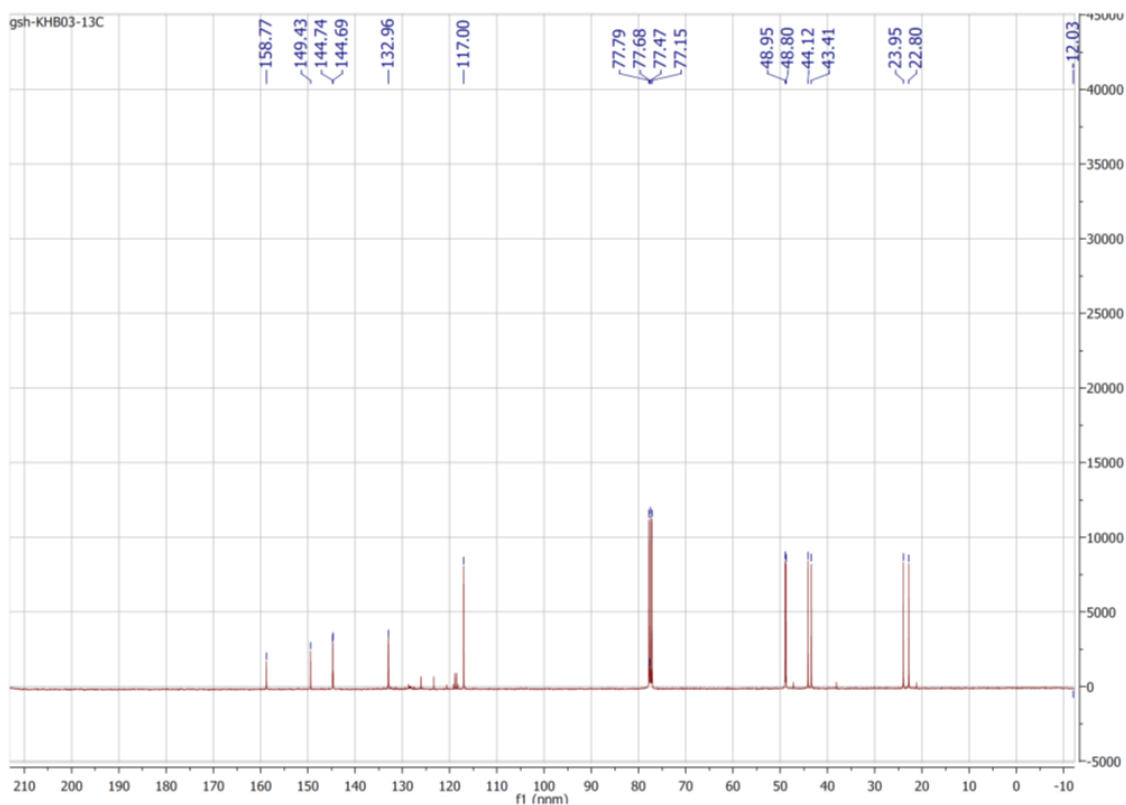

Figure S5.  $^{13}\text{C}$  NMR spectrum of **L2** ( $\text{CF}_3\text{-gpy}$ ) in  $\text{CDCl}_3$  at 400 MHz at r.t.

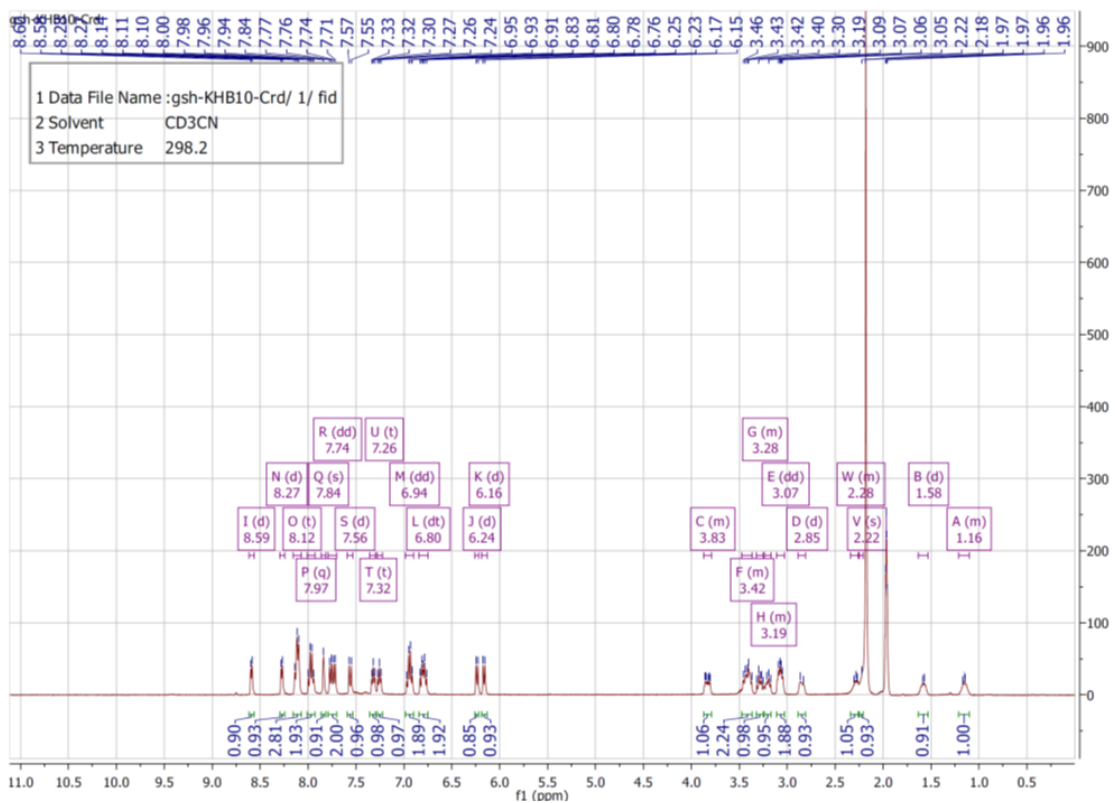

Figure S6.  $^1\text{H}$  NMR spectrum of  $[\text{Ir}(\text{ppy})_2(\text{CF}_3\text{-gpy})]\text{PF}_6$ , **1a** in Acetonitrile- $d_3$  at 400 MHz.

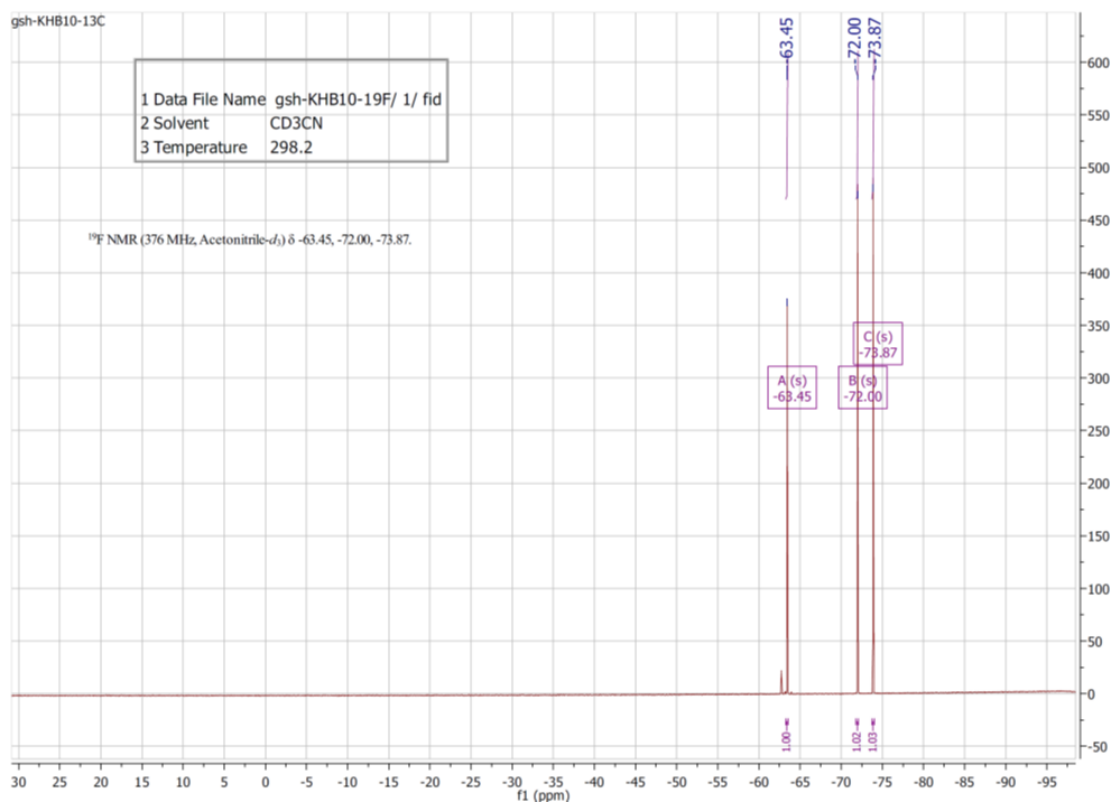

Figure S7.  $^{19}\text{F}$  NMR spectrum of  $[\text{Ir}(\text{ppy})_2(\text{CF}_3\text{-gpy})]\text{PF}_6$ , **1a** in Acetonitrile- $d_3$  at 400 MHz.

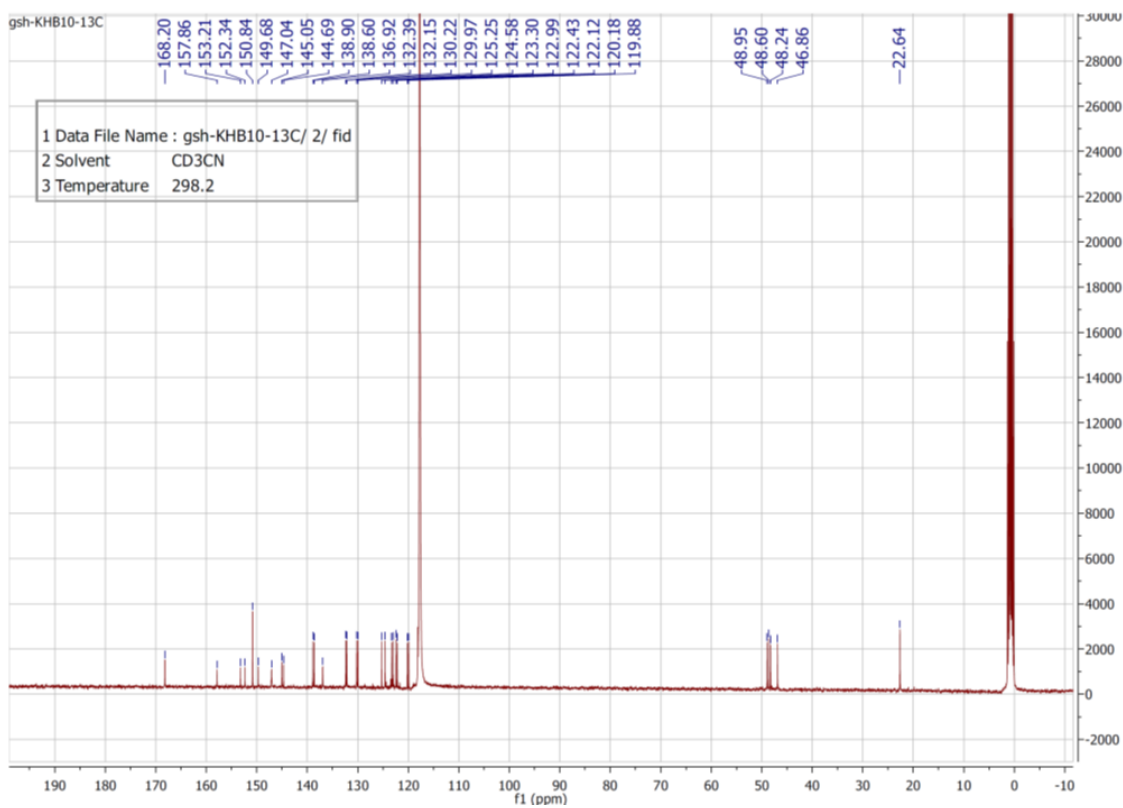

Figure S8.  $^{13}\text{C}$  NMR spectrum of  $[\text{Ir}(\text{ppy})_2(\text{CF}_3\text{-gpy})]\text{PF}_6$ , **1a** in Acetonitrile- $d_3$  at 400 MHz.

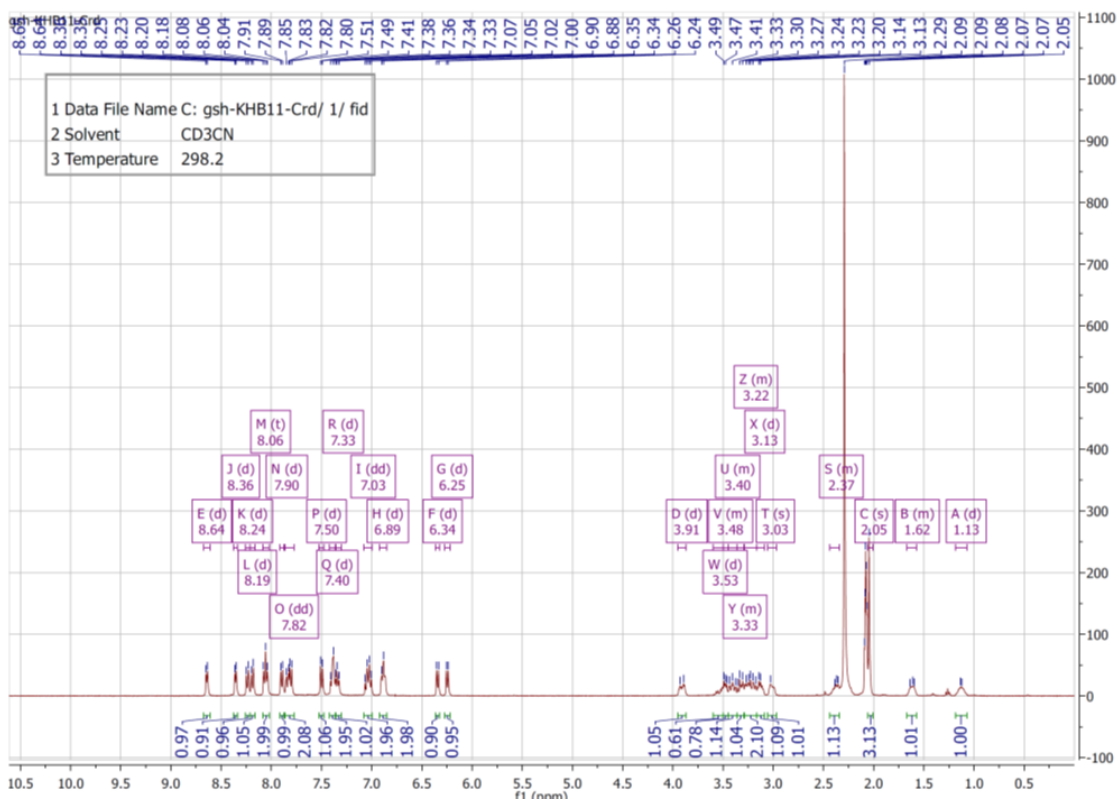

Figure S9.  $^1\text{H}$  NMR spectrum of  $[\text{Ir}(\text{ppy})_2(\text{Me-gpy})]\text{PF}_6$ , **1b** in Acetonitrile- $d_3$  at 400 MHz.

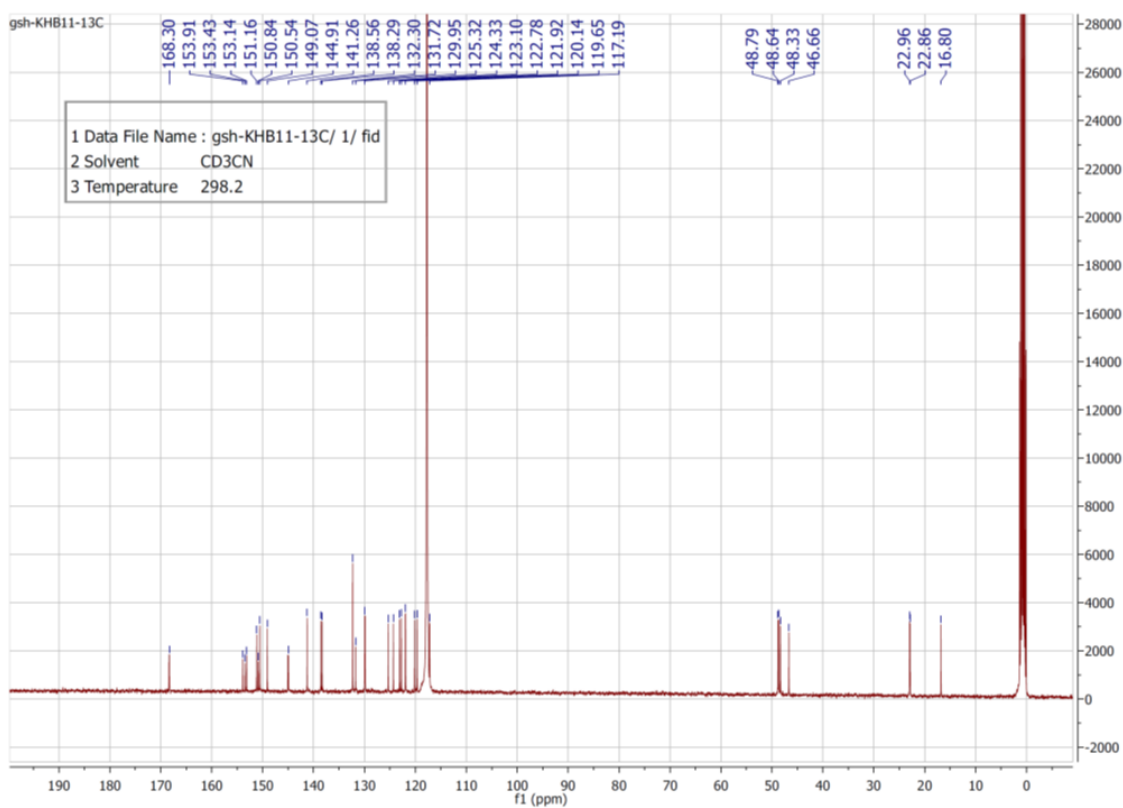

Figure S10.  $^{13}\text{C}$  NMR spectrum of  $[\text{Ir}(\text{ppy})_2(\text{Me-gpy})]\text{PF}_6$ , **1b** in Acetonitrile- $d_3$  at 400 MHz.

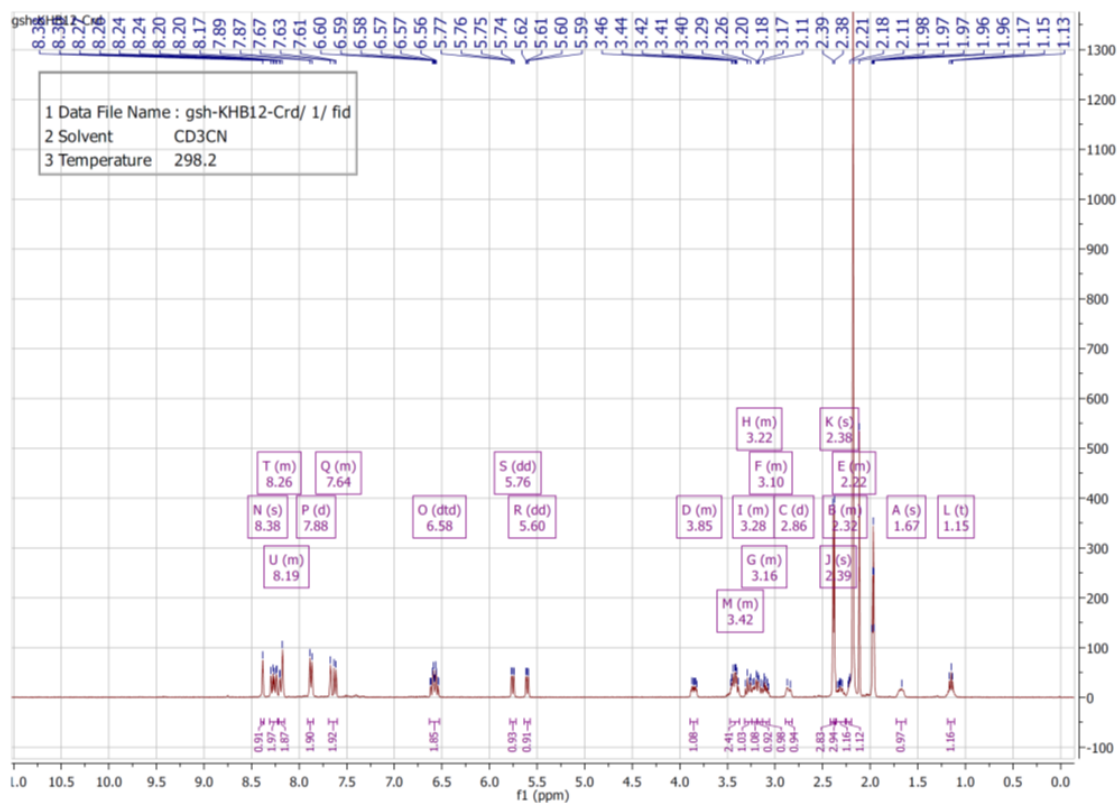

Figure S11.  $^1\text{H}$  NMR spectrum of  $[\text{Ir}(\text{dFMeppy})_2(\text{CF}_3\text{-gpy})]\text{PF}_6$ , **2a** in Acetonitrile- $d_3$  at 400 MHz.

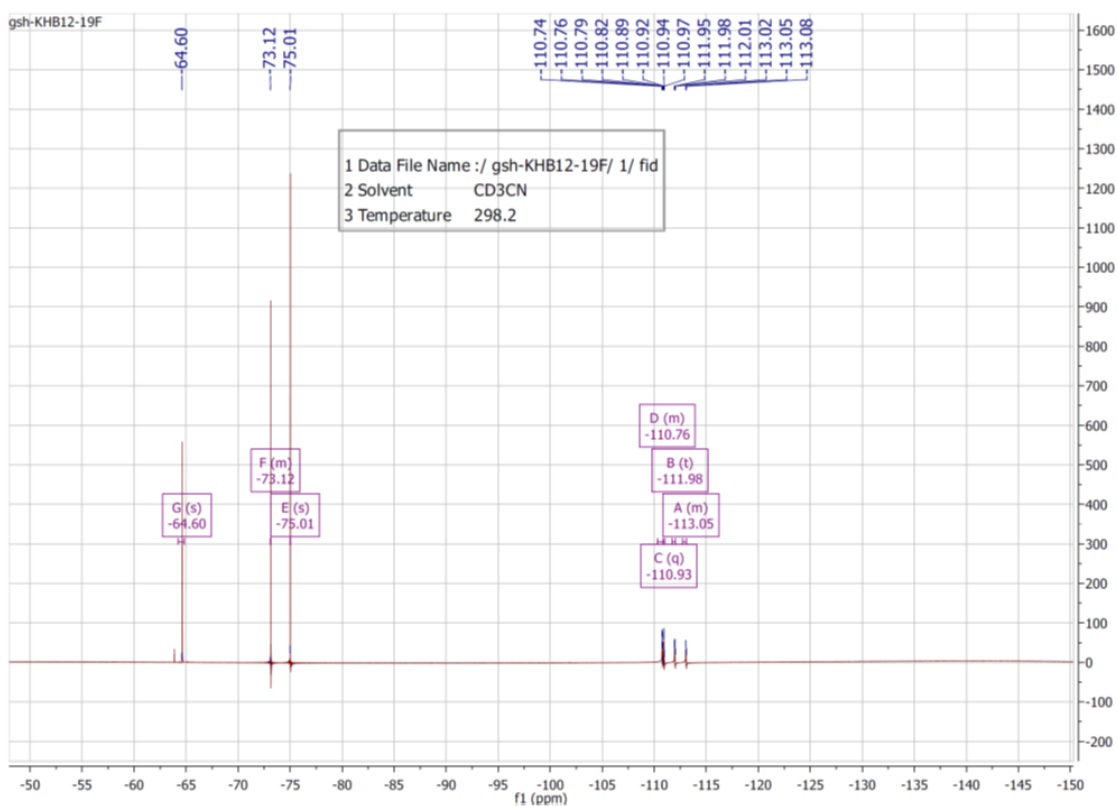

Figure S12.  $^{19}\text{F}$  NMR spectrum of  $[\text{Ir}(\text{dFMeppy})_2(\text{CF}_3\text{-gpy})]\text{PF}_6$ , **2a** in Acetonitrile- $d_3$  at 400 MHz.

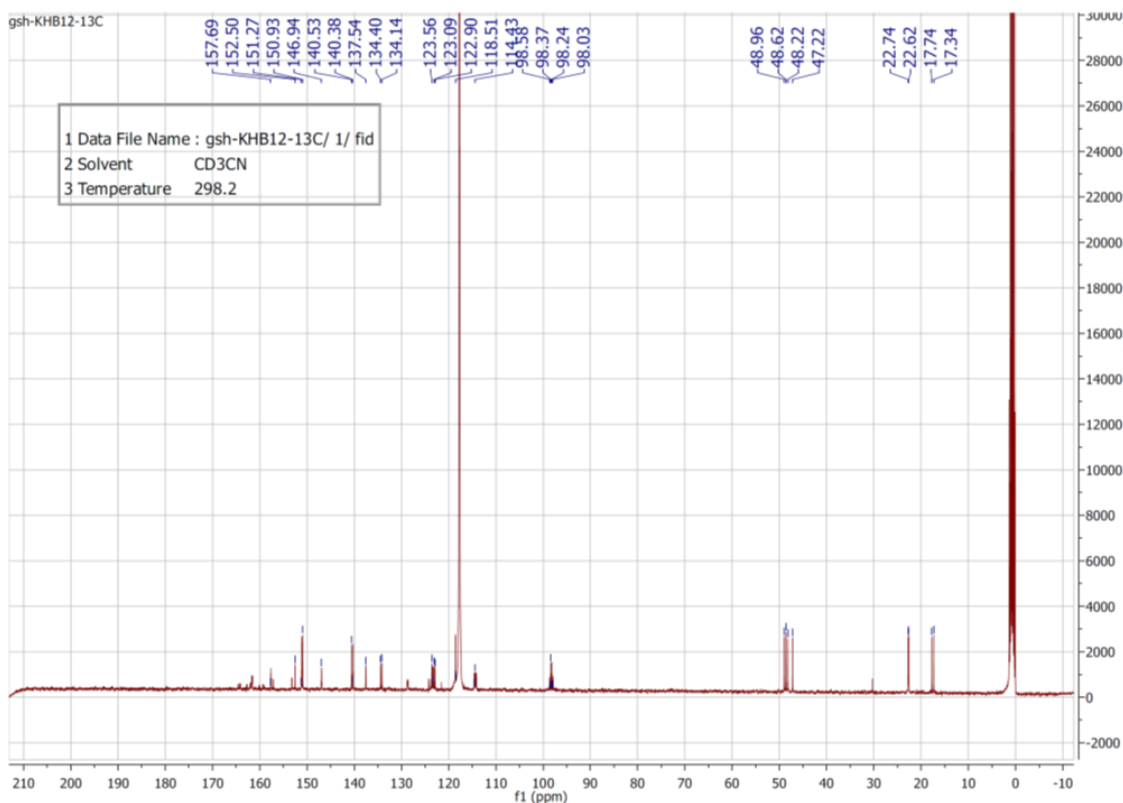

Figure S13.  $^{13}\text{C}$  NMR spectrum of  $[\text{Ir}(\text{dFMeppy})_2(\text{CF}_3\text{-gpy})]\text{PF}_6$ , **2a** in Acetonitrile- $d_3$  at 400 MHz.

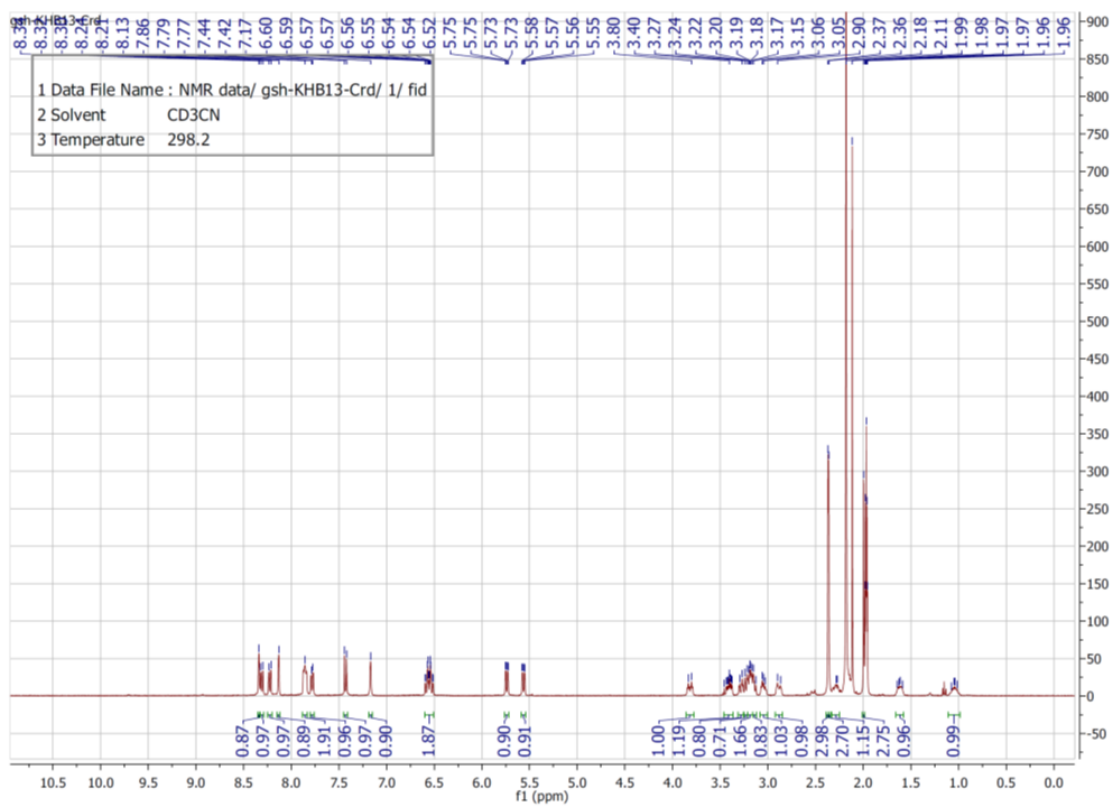

Figure S14.  $^1\text{H}$  NMR spectrum of  $[\text{Ir}(\text{dFMeppy})_2(\text{Me-gpy})]\text{PF}_6$ , **2b** in Acetonitrile- $d_3$  at 400 MHz.



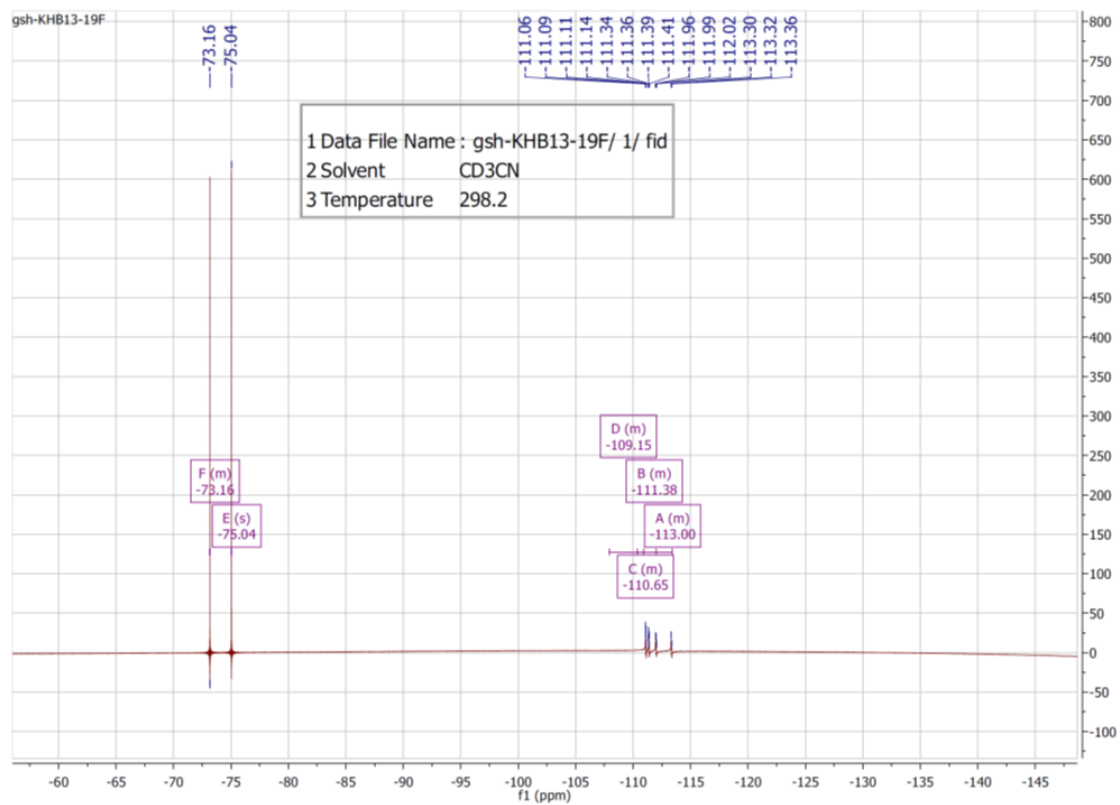

Figure S15.  $^{19}\text{F}$  NMR spectrum of  $[\text{Ir}(\text{dFMeppy})_2(\text{Me-gpy})]\text{PF}_6$ , **2b** in Acetonitrile- $d_3$  at 400 MHz.

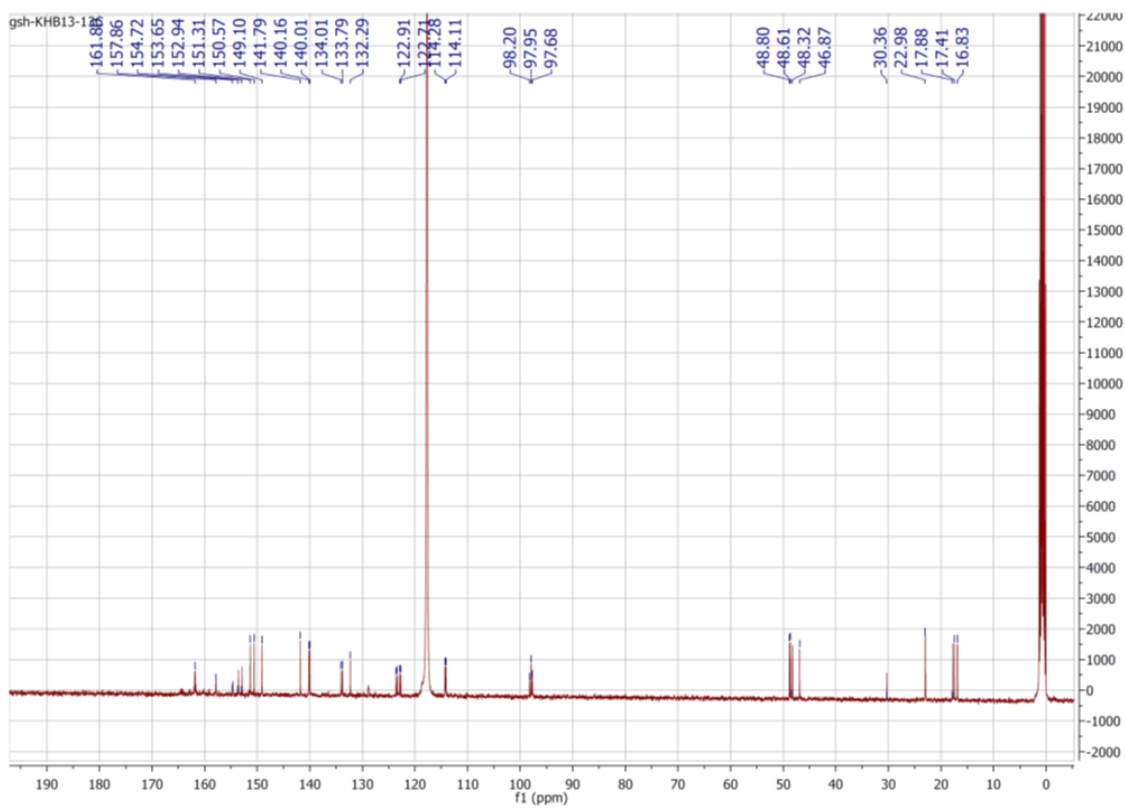

Figure S16.  $^{13}\text{C}$  NMR spectrum of  $[\text{Ir}(\text{dFMeppy})_2(\text{Me-gpy})]\text{PF}_6$ , **2b** in Acetonitrile- $d_3$  at 400 MHz at r.t.

## Photophysical Characterisation

### Aerated and Degassed Solution

The photophysical properties of the complexes **1a–2b** in aerated and degassed MeCN solution were investigated using steady-state techniques by measuring UV-Vis absorption spectra, photoluminescence (PL) spectra, PL quantum yields ( $\Phi_{PL}$ ), and time-resolved PL spectra using Time Correlated Single Photon Counting (TCSPC).

A Cary 300-UV-Vis spectrophotometer was used to obtain the absorption spectra of samples in the wavelength range of 200 - 800 nm. The absorbance of the samples was adjusted to be close to 0.1 at 360 nm for all investigated complexes. The PL spectra were obtained at an excitation wavelength of 360 nm using an Edinburgh instruments FLS980 fluorimeter. Solution photoluminescence quantum yield ( $\Phi_{PL}$ ) was measured using the optically dilute method described by Demas and Crosby<sup>1</sup>  $\Phi_{PL}(x) = \Phi_{PL}(r) \left( \frac{A_r(\lambda_r)}{A_x(\lambda_x)} \right) \left( \frac{I(\lambda_r)}{I(\lambda_x)} \right) \left( \frac{n_x}{n_r} \right)^2 \left( \frac{D_x}{D_r} \right)$ , where  $A(\lambda)$  is absorbance at excitation wavelength of 360 nm,  $I(\lambda)$  is relative intensity of exciting light,  $n$  is the refractive index of the solvents and  $D$  is the integrated area under the corrected emission spectra (at an excitation wavelength of 360 nm). Here  $x$  and  $r$  refer to unknown and reference solutions, respectively. For  $\Phi_{PL}$  measurements, the solutions were prepared by mixing complexes in MeCN ( $n = 1.344$ ), whereas the reference solution was prepared by diluting quinine sulfate dihydrate in 0.5M H<sub>2</sub>SO<sub>4</sub> ( $n = 1.35$ ).  $\Phi_{PL}$  of 54.6% was used for reference solution.<sup>2</sup> For lifetime measurements, the sample was excited with a 375 nm PicoQuant picosecond laser and PL emission was detected at a detection wavelength of 512 nm for **1a, 1b** and 470 nm for **2a, 2b**.

PL decay traces in aerated solution are given in **Fig. 2(b)** (main manuscript). The PL decays were fitted with a single exponential decay and resulting lifetimes are given in Table 1 (main manuscript). The radiative ( $k_r$ ) and non-radiative decay ( $k_{nr}$ ) rate constants calculated using eq. **S1** and **S2** are also given in Table 1 (main manuscript)

$$k_r = \frac{\Phi_{PL}}{\tau} \quad (\text{S1})$$

$$k_{nr} = \frac{(1 - \Phi_{PL})}{\tau} \quad (\text{S2})$$

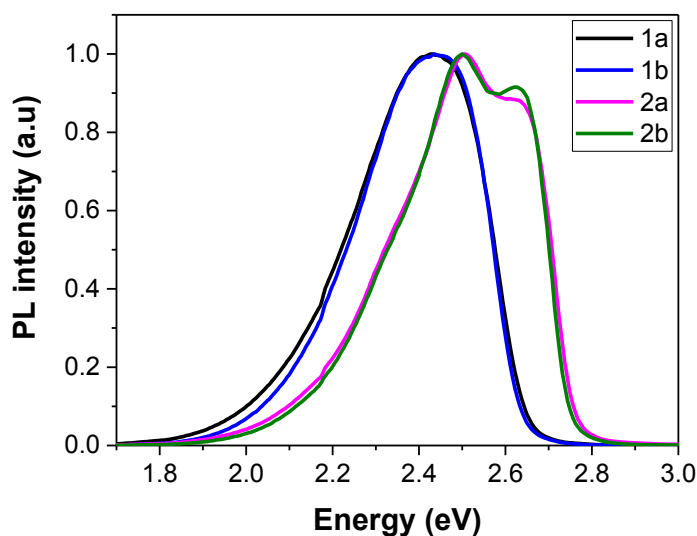

**Figure S18:** Emission spectra of MeCN degassed solutions, following excitation at 360 nm.

The PL spectra of degassed solutions are shown in **Fig. S18**. The PL spectra are qualitatively similar to aerated solution except with increased PL intensity in degassed solution. Huang Rhys factors were estimated by taking the ratio of the (0, 1) and (0, 0) peaks. PL decays of **1b** and **2b** in degassed solution follow mono-exponential decay whereas PL decays of **1a** and **2a** have biexponential decays (**Fig. 3**). The details about the fitting parameters are given in Table **S1**.

**Table S1:** The fitting parameters for time-resolved luminescence of complexes measured in degassed MeCN solution.

| Materials | A <sub>1</sub> | $\tau_1(\mu\text{s})$ | A <sub>2</sub> | $\tau_2(\mu\text{s})$ |
|-----------|----------------|-----------------------|----------------|-----------------------|
| <b>1a</b> | 0.87           | 0.09                  | 0.13           | 1.60                  |
| <b>1b</b> | 1.0            | 1.90                  | -              | -                     |
| <b>2a</b> | 0.93           | 0.11                  | 0.07           | 0.98                  |
| <b>2b</b> | 1.0            | 2.60                  | -              | -                     |

### Solid-state thin film

We measured the PL lifetime of 2 wt% of the complexes doped into 98 wt% PMMA as thin films at different temperatures and in different environments (air, vacuum). Table **S2** shows the fitted lifetime parameters.

**Table S2:** The fitting parameters for time-resolved luminescence of 2wt% of **2a** in PMMA (**Fig. 6(b)**) at various temperatures.

| Environment | A <sub>1</sub> | $\tau_1(\mu\text{s})$ | A <sub>2</sub> | $\tau_2(\mu\text{s})$ |
|-------------|----------------|-----------------------|----------------|-----------------------|
| RT-air      | 0.09           | 0.82                  | 0.91           | 2.80                  |
| RT-vacuum   | 0.10           | 0.92                  | 0.90           | 3.00                  |
| 150K-vacuum | 1.0            | 3.20                  | -              | -                     |
| 77K-vacuum  | 1.0            | 3.70                  | -              | -                     |

In conjunction with transient PL measurements, we measured the  $\Phi_{\text{PL}}$  of complexes **2a** and **2b** in air and under N<sub>2</sub>. For films,  $\Phi_{\text{PL}}$  was measured using an integrating sphere and excitation wavelength of 380 nm and the results are compared with solution in Table **S3**. The  $\Phi_{\text{PL}}$  of **2a** increased by more than 30 times compared to degassed solution and increases even further when measured under N<sub>2</sub>. In the case of **2b**,  $\Phi_{\text{PL}}$  also increases on going from solution to film, but by a much smaller amount.

**Table S3:** Comparison of  $\Phi_{\text{PL}}$  values of solution (before degassing, after degassing) and solid-state films (in air and under N<sub>2</sub>) of **2a** and **2b**. For solution, an excitation wavelength of 360 nm was used and for solid-state, an excitation wavelength of 380 nm was used.

| Materials | PLQY(%)<br>Solution<br>Before degassing | PLQY(%)<br>Solution, after<br>degassing | PLQY(%)<br>Film<br>RT-Air | PLQY(%)<br>Film<br>RT-N <sub>2</sub> |
|-----------|-----------------------------------------|-----------------------------------------|---------------------------|--------------------------------------|
| <b>2a</b> | 1.0                                     | 1.7                                     | 65.9                      | 72.4                                 |
| <b>2b</b> | 1.2                                     | 65.6                                    | 82.7                      | 88.6                                 |

## DFT Calculations:

Computational details:

All calculations were performed with the Gaussian09, revision D.01<sup>3</sup> suite of programs employing the DFT method, the Becke three-parameter hybrid functional,<sup>4</sup> and Lee-Yang-Parr's gradient-corrected correlation functional (B3LYP).<sup>5</sup> Singlet and triplet ground state geometry optimizations for **[1a]<sup>+</sup>**, **[1b]<sup>+</sup>**, **[2a]<sup>+</sup>** and **[2b]<sup>+</sup>** were carried out at the (R)B3LYP and (U)B3LYP levels in the gas phase, using their respective crystallographic structures as starting points. All elements except Iridium were assigned the 6-31G(d,p) basis set.<sup>6</sup> The double- $\zeta$  quality SBKJC VDZ ECP basis set<sup>7</sup> with an effective core potential was employed for the Ir(III)-ion. Vibrational frequency calculations were performed to ensure that the optimized geometries represent the local minima and there are only positive eigenvalues, except frequency mode no. 1 for **1a** and **2a**, which were found to be rotational motion of the  $-\text{CF}_3$  group around the C-C bond of the pyridine ring of the guanidylpyridine (gpy) unit. The electronic distribution and localization of the singlet excited states were visualized using the electron density difference maps (ED-DMs).<sup>8</sup> *Gausssum 2.2* and *Chemission* were employed to visualize the absorption spectra (simulated with Gaussian distribution with a full-width at half maximum (fwhm) set to  $3000\text{ cm}^{-1}$ ) and to calculate the fractional contributions of various groups to each molecular orbital. All calculated structures and Kohn-Sham orbitals were visualized with ChemCraft.<sup>9</sup>

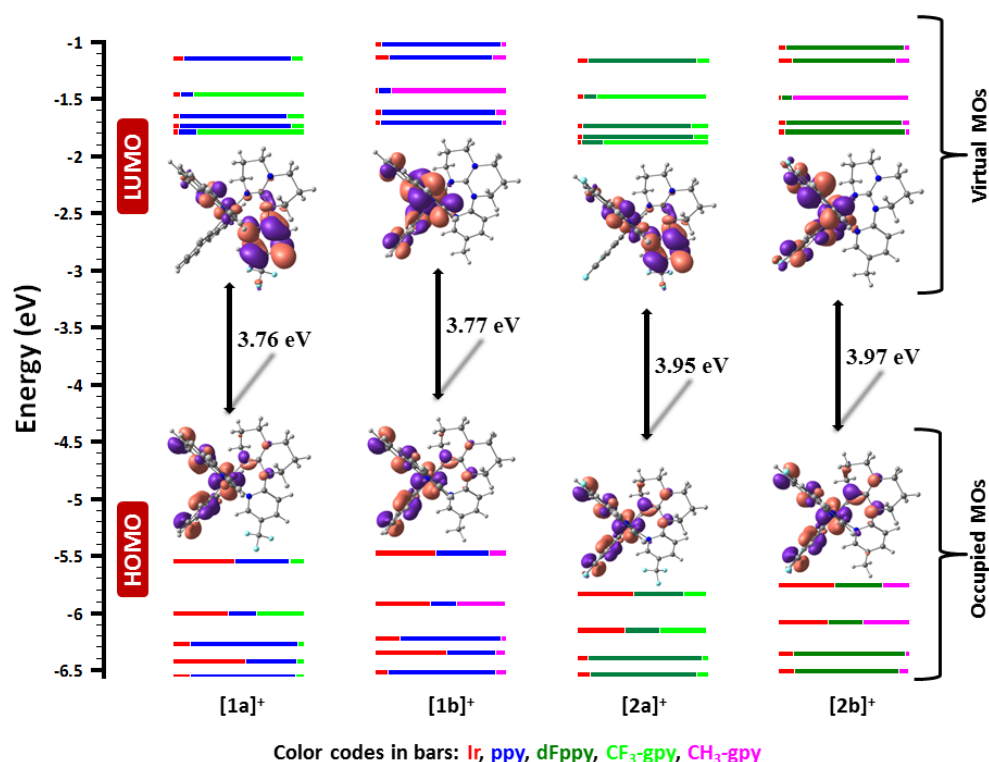

**Figure S20:** Calculated frontier MO energies of **[1a]<sup>+</sup>**, **[1b]<sup>+</sup>**, **[2a]<sup>+</sup>** and **[2b]<sup>+</sup>**, obtained from DFT [(B3LYP/SBKJC-VDZ for Ir(III)) and (6-31g\*\* for C,H,N,F) with CPCM(CH<sub>3</sub>CN) and 0.5 eV threshold of degeneracy (orbitals are isocontoured at 0.03). Kohn-Sham MOs of **[1a]<sup>+</sup>**, **[1b]<sup>+</sup>**, **[2a]<sup>+</sup>** and **[2b]<sup>+</sup>** are also shown.

**Table S4.** Vibrational modes and their associated energies contributing to deactivation in complex **2a** but less in complex **2b**.

| Vibrational mode no. | Status                                                             | Energy associated (cm <sup>-1</sup> )                | Nature of the mode                                                                                                                                                             |
|----------------------|--------------------------------------------------------------------|------------------------------------------------------|--------------------------------------------------------------------------------------------------------------------------------------------------------------------------------|
| 115                  | Present in <b>2a</b> but absent in <b>2b</b>                       | 1029.62                                              | Symmetric stretching of the C-C and C-N bonds in pyridine part of C <sup>^</sup> N ligand couples with wagging mode of C and N atoms of the pyridine ring of the gpy ligand    |
| 121                  | Strongly present in <b>2a</b> but very weakly present in <b>2b</b> | 1054.21 (for <b>2a</b> )<br>1090.90 (for <b>2b</b> ) | Asymmetric stretching modes of the Ir-N <sub>dFppy</sub> bonds couple with the asymmetric stretching modes of the C-N and C-C bonds of the pyridine ring of the gpy ligand     |
| 148                  | Present in <b>2a</b> but very weakly present in <b>2b</b>          | 1293.30 (for <b>2a</b> )<br>1315.06 (for <b>2b</b> ) | Asymmetric stretching modes of the Ir-C <sub>dFppy</sub> bonds couple with the asymmetric stretching modes of the C-N and C-C bonds of the pyridine ring of the gpy ligand     |
| 149                  | Present in <b>2a</b> but absent in <b>2b</b>                       | 1294.48                                              | Asymmetric stretching modes of the Ir-C <sub>dFppy</sub> bonds couple with the asymmetric stretching modes of the C-N and C-C bonds of the pyridine ring of the gpy ligand     |
| 151                  | Present in <b>2a</b> but absent in <b>2b</b>                       | 1311.82                                              | Asymmetric wagging modes of the Ir-N <sub>dFppy</sub> bonds couple with the wagging mode of the C-N of the pyridine ring of the gpy ligand                                     |
| 153                  | Present in <b>2a</b> but very weakly present in <b>2b</b>          | 1317.10 (for <b>2a</b> )<br>1340.73 (for <b>2b</b> ) | Asymmetric wagging modes of the Ir-N <sub>dFppy</sub> bonds couple with the rocking mode of the C-N bonds of the pyridine ring of the gpy ligand                               |
| 169                  | Present in <b>2a</b> but absent in <b>2b</b>                       | 1450.11                                              | Asymmetric stretching modes of C-C bonds in phenyl part of the C <sup>^</sup> N ligand couple with rocking mode of the C-H bond adjacent to pyridine N-atom of the gpy ligand. |

**Table S5.** Optimized Atomic coordinates obtained from DFT calculations of [1a]<sup>+</sup>

| Center<br>Number | Atomic<br>Number | Atomic<br>Type | Coordinates (Angstroms) |           |           |
|------------------|------------------|----------------|-------------------------|-----------|-----------|
|                  |                  |                | X                       | Y         | Z         |
| 1                | 77               | 0              | -0.299272               | -0.503853 | -0.031980 |
| 2                | 7                | 0              | 0.913081                | -1.211374 | -1.582674 |
| 3                | 7                | 0              | -1.526542               | -0.059153 | 1.598792  |
| 4                | 7                | 0              | 1.172939                | 1.161529  | 0.225251  |
| 5                | 6                | 0              | 3.147761                | 3.137383  | 0.194210  |
| 6                | 7                | 0              | -0.540387               | 2.823468  | 0.083045  |
| 7                | 7                | 0              | -2.500112               | 3.116895  | -1.184572 |
| 8                | 7                | 0              | -1.334831               | 1.065618  | -1.265838 |
| 9                | 6                | 0              | 0.754321                | -1.927677 | 0.965511  |
| 10               | 6                | 0              | 1.665614                | -2.661658 | 0.156266  |
| 11               | 6                | 0              | 2.462984                | -3.685094 | 0.700409  |
| 12               | 1                | 0              | 3.157746                | -4.238774 | 0.075782  |
| 13               | 6                | 0              | 2.369384                | -3.997542 | 2.050584  |
| 14               | 1                | 0              | 2.983249                | -4.787238 | 2.471550  |
| 15               | 6                | 0              | 1.477979                | -3.285347 | 2.860537  |
| 16               | 1                | 0              | 1.399294                | -3.527708 | 3.917002  |
| 17               | 6                | 0              | 0.683603                | -2.269890 | 2.324568  |
| 18               | 1                | 0              | -0.004808               | -1.747880 | 2.981926  |
| 19               | 6                | 0              | 1.728286                | -2.260750 | -1.248485 |
| 20               | 6                | 0              | 0.930157                | -0.723103 | -2.839741 |
| 21               | 1                | 0              | 0.279722                | 0.122174  | -3.021608 |
| 22               | 6                | 0              | 1.726676                | -1.257657 | -3.840102 |
| 23               | 1                | 0              | 1.701150                | -0.831911 | -4.836581 |
| 24               | 6                | 0              | 2.546803                | -2.345781 | -3.526282 |
| 25               | 1                | 0              | 3.179881                | -2.797207 | -4.283655 |
| 26               | 6                | 0              | 2.548230                | -2.839901 | -2.230238 |
| 27               | 1                | 0              | 3.183677                | -3.676607 | -1.967159 |
| 28               | 6                | 0              | -1.768675               | -1.870010 | -0.311825 |
| 29               | 6                | 0              | -2.852851               | -1.768379 | 0.602287  |
| 30               | 6                | 0              | -3.979954               | -2.601327 | 0.489519  |
| 31               | 1                | 0              | -4.805961               | -2.514777 | 1.189554  |
| 32               | 6                | 0              | -4.045208               | -3.553866 | -0.520369 |
| 33               | 1                | 0              | -4.913651               | -4.199000 | -0.606296 |
| 34               | 6                | 0              | -2.978182               | -3.679566 | -1.416223 |
| 35               | 1                | 0              | -3.018412               | -4.431491 | -2.199814 |
| 36               | 6                | 0              | -1.858239               | -2.851064 | -1.311118 |
| 37               | 1                | 0              | -1.046124               | -2.978706 | -2.020530 |
| 38               | 6                | 0              | -2.688828               | -0.778966 | 1.664623  |
| 39               | 6                | 0              | -1.228198               | 0.818536  | 2.577693  |
| 40               | 1                | 0              | -0.270546               | 1.314903  | 2.487538  |

|    |   |   |           |           |           |
|----|---|---|-----------|-----------|-----------|
| 41 | 6 | 0 | -2.072821 | 1.064559  | 3.649177  |
| 42 | 1 | 0 | -1.781239 | 1.773091  | 4.416116  |
| 43 | 6 | 0 | -3.283807 | 0.367277  | 3.713881  |
| 44 | 1 | 0 | -3.973273 | 0.532071  | 4.535927  |
| 45 | 6 | 0 | -3.584606 | -0.555602 | 2.723320  |
| 46 | 1 | 0 | -4.505249 | -1.124434 | 2.770868  |
| 47 | 6 | 0 | 0.826841  | 2.463124  | 0.104359  |
| 48 | 6 | 0 | 1.807424  | 3.469303  | 0.066864  |
| 49 | 1 | 0 | 1.520621  | 4.502190  | -0.083968 |
| 50 | 6 | 0 | 3.493015  | 1.794231  | 0.343212  |
| 51 | 6 | 0 | 4.925424  | 1.365843  | 0.543636  |
| 52 | 6 | 0 | 2.478870  | 0.846560  | 0.335453  |
| 53 | 1 | 0 | 2.701165  | -0.208929 | 0.435469  |
| 54 | 6 | 0 | -0.944552 | 4.050635  | 0.795483  |
| 55 | 1 | 0 | -0.119832 | 4.367345  | 1.432624  |
| 56 | 1 | 0 | -1.785085 | 3.801303  | 1.454895  |
| 57 | 6 | 0 | -1.354928 | 5.114057  | -0.214459 |
| 58 | 1 | 0 | -1.625148 | 6.052507  | 0.278184  |
| 59 | 1 | 0 | -0.520119 | 5.325324  | -0.891045 |
| 60 | 6 | 0 | -2.556663 | 4.572869  | -0.980864 |
| 61 | 1 | 0 | -3.476440 | 4.786152  | -0.420522 |
| 62 | 1 | 0 | -2.659122 | 5.061550  | -1.958254 |
| 63 | 6 | 0 | -3.705963 | 2.597037  | -1.858245 |
| 64 | 1 | 0 | -3.769811 | 3.075152  | -2.844636 |
| 65 | 1 | 0 | -4.581682 | 2.925283  | -1.284194 |
| 66 | 6 | 0 | -3.675361 | 1.082056  | -2.005235 |
| 67 | 1 | 0 | -4.380674 | 0.776546  | -2.783645 |
| 68 | 1 | 0 | -3.973347 | 0.586768  | -1.076193 |
| 69 | 6 | 0 | -2.246952 | 0.672898  | -2.350966 |
| 70 | 1 | 0 | -2.168745 | -0.404400 | -2.489281 |
| 71 | 1 | 0 | -1.942492 | 1.158507  | -3.290736 |
| 72 | 6 | 0 | -1.470573 | 2.290092  | -0.825926 |
| 73 | 1 | 0 | 3.914337  | 3.903501  | 0.156200  |
| 74 | 9 | 0 | 5.776687  | 2.265072  | 0.013789  |
| 75 | 9 | 0 | 5.216947  | 1.248687  | 1.853581  |
| 76 | 9 | 0 | 5.161232  | 0.170996  | -0.032945 |

---

**Table S6.** Optimized Atomic coordinates obtained from DFT calculations of [1b]<sup>+</sup>

| Center Number | Atomic Number | Atomic Type | Coordinates (Angstroms) |           |           |
|---------------|---------------|-------------|-------------------------|-----------|-----------|
|               |               |             | X                       | Y         | Z         |
| 1             | 77            | 0           | 0.379026                | -0.180801 | 0.000920  |
| 2             | 7             | 0           | 1.684968                | 0.623467  | -1.419849 |
| 3             | 7             | 0           | -0.720280               | -1.154964 | 1.483910  |
| 4             | 7             | 0           | -0.197472               | 1.919051  | 0.514309  |
| 5             | 6             | 0           | -0.736992               | 4.640390  | 0.739824  |
| 6             | 7             | 0           | -2.524730               | 1.434885  | 0.220148  |
| 7             | 7             | 0           | -3.814309               | 0.113446  | -1.235787 |
| 8             | 7             | 0           | -1.456714               | -0.015041 | -1.287898 |
| 9             | 6             | 0           | 2.117597                | -0.227007 | 1.052760  |
| 10            | 6             | 0           | 3.259459                | 0.207161  | 0.323006  |
| 11            | 6             | 0           | 4.538084                | 0.221928  | 0.909524  |
| 12            | 1             | 0           | 5.404232                | 0.554390  | 0.344616  |
| 13            | 6             | 0           | 4.706009                | -0.191160 | 2.225129  |
| 14            | 1             | 0           | 5.692199                | -0.182301 | 2.678184  |
| 15            | 6             | 0           | 3.593380                | -0.618892 | 2.958170  |
| 16            | 1             | 0           | 3.719716                | -0.944996 | 3.987205  |
| 17            | 6             | 0           | 2.323216                | -0.637863 | 2.379035  |
| 18            | 1             | 0           | 1.485715                | -0.987084 | 2.974787  |
| 19            | 6             | 0           | 3.001689                | 0.659098  | -1.043446 |
| 20            | 6             | 0           | 1.322115                | 1.076165  | -2.636881 |
| 21            | 1             | 0           | 0.261374                | 1.044721  | -2.848860 |
| 22            | 6             | 0           | 2.237792                | 1.556086  | -3.560404 |
| 23            | 1             | 0           | 1.896869                | 1.903989  | -4.528749 |
| 24            | 6             | 0           | 3.590741                | 1.571907  | -3.208124 |
| 25            | 1             | 0           | 4.339562                | 1.930900  | -3.907244 |
| 26            | 6             | 0           | 3.967091                | 1.129016  | -1.948434 |
| 27            | 1             | 0           | 5.009790                | 1.142616  | -1.655271 |
| 28            | 6             | 0           | 0.713391                | -2.111650 | -0.520330 |
| 29            | 6             | 0           | 0.013946                | -3.066766 | 0.267144  |
| 30            | 6             | 0           | 0.097923                | -4.442416 | -0.011463 |
| 31            | 1             | 0           | -0.442978               | -5.165035 | 0.592950  |
| 32            | 6             | 0           | 0.883324                | -4.894215 | -1.065295 |
| 33            | 1             | 0           | 0.950725                | -5.956039 | -1.279374 |
| 34            | 6             | 0           | 1.592248                | -3.969085 | -1.838908 |
| 35            | 1             | 0           | 2.217980                | -4.317465 | -2.656376 |
| 36            | 6             | 0           | 1.508337                | -2.601221 | -1.568034 |
| 37            | 1             | 0           | 2.077428                | -1.912259 | -2.184852 |
| 38            | 6             | 0           | -0.753421               | -2.519599 | 1.383721  |
| 39            | 6             | 0           | -1.327672               | -0.546013 | 2.522029  |
| 40            | 1             | 0           | -1.223386               | 0.530751  | 2.559865  |
| 41            | 6             | 0           | -2.028294               | -1.242014 | 3.495265  |
| 42            | 1             | 0           | -2.490988               | -0.705746 | 4.316005  |
| 43            | 6             | 0           | -2.102106               | -2.635097 | 3.392434  |
| 44            | 1             | 0           | -2.640994               | -3.216548 | 4.133955  |
| 45            | 6             | 0           | -1.460405               | -3.268614 | 2.338667  |
| 46            | 1             | 0           | -1.486051               | -4.348280 | 2.255010  |
| 47            | 6             | 0           | -1.462957               | 2.364380  | 0.379016  |
| 48            | 6             | 0           | -1.751758               | 3.735139  | 0.466577  |
| 49            | 1             | 0           | -2.763310               | 4.088160  | 0.307000  |
| 50            | 6             | 0           | 0.575940                | 4.185239  | 0.915449  |



|    |   |   |           |           |           |
|----|---|---|-----------|-----------|-----------|
| 51 | 6 | 0 | 1.714650  | 5.117915  | 1.236083  |
| 52 | 6 | 0 | 0.780601  | 2.815853  | 0.770362  |
| 53 | 1 | 0 | 1.773039  | 2.393777  | 0.879672  |
| 54 | 6 | 0 | -3.784624 | 1.695306  | 0.939422  |
| 55 | 1 | 0 | -3.608904 | 2.490246  | 1.663068  |
| 56 | 1 | 0 | -4.054273 | 0.794820  | 1.505977  |
| 57 | 6 | 0 | -4.879589 | 2.041701  | -0.061352 |
| 58 | 1 | 0 | -5.822493 | 2.279184  | 0.439751  |
| 59 | 1 | 0 | -4.583360 | 2.920592  | -0.643585 |
| 60 | 6 | 0 | -5.070557 | 0.827974  | -0.963636 |
| 61 | 1 | 0 | -5.753306 | 0.115348  | -0.481761 |
| 62 | 1 | 0 | -5.529277 | 1.109947  | -1.920164 |
| 63 | 6 | 0 | -4.020048 | -1.093336 | -2.058679 |
| 64 | 1 | 0 | -4.439363 | -0.774061 | -3.022175 |
| 65 | 1 | 0 | -4.780816 | -1.713403 | -1.567415 |
| 66 | 6 | 0 | -2.728034 | -1.868783 | -2.274630 |
| 67 | 1 | 0 | -2.839409 | -2.531521 | -3.137954 |
| 68 | 1 | 0 | -2.489630 | -2.492154 | -1.407572 |
| 69 | 6 | 0 | -1.603737 | -0.858889 | -2.483584 |
| 70 | 1 | 0 | -0.655522 | -1.361897 | -2.667283 |
| 71 | 1 | 0 | -1.830183 | -0.232455 | -3.360124 |
| 72 | 6 | 0 | -2.568306 | 0.483430  | -0.806102 |
| 73 | 1 | 0 | -0.964039 | 5.700920  | 0.805628  |
| 74 | 1 | 0 | 1.803953  | 5.905753  | 0.480675  |
| 75 | 1 | 0 | 1.559670  | 5.610513  | 2.202032  |
| 76 | 1 | 0 | 2.666613  | 4.583962  | 1.281820  |

**Table S7.** Optimized Atomic coordinates obtained from DFT calculations of [2a]<sup>+</sup>

| Center Number | Atomic Number | Atomic Type | Coordinates (Angstroms) |           |           |
|---------------|---------------|-------------|-------------------------|-----------|-----------|
|               |               |             | X                       | Y         | Z         |
| 1             | 77            | 0           | -0.264059               | -0.177326 | -0.088916 |
| 2             | 7             | 0           | 0.819579                | -0.951519 | -1.701762 |
| 3             | 7             | 0           | -1.399419               | 0.328538  | 1.589484  |
| 4             | 7             | 0           | 1.401591                | 1.277765  | 0.189734  |
| 5             | 6             | 0           | 3.601406                | 2.999656  | 0.171194  |
| 6             | 7             | 0           | -0.098087               | 3.138522  | 0.175821  |
| 7             | 7             | 0           | -2.035698               | 3.727235  | -1.019189 |
| 8             | 7             | 0           | -1.143876               | 1.549775  | -1.211228 |
| 9             | 6             | 0           | 0.637346                | -1.755701 | 0.817518  |
| 10            | 6             | 0           | 1.423136                | -2.562720 | -0.060843 |
| 11            | 6             | 0           | 2.072270                | -3.694440 | 0.464814  |
| 12            | 9             | 0           | 2.823521                | -4.481819 | -0.336582 |
| 13            | 6             | 0           | 1.988333                | -4.058426 | 1.797497  |
| 14            | 1             | 0           | 2.500807                | -4.935464 | 2.171668  |
| 15            | 6             | 0           | 1.218669                | -3.248108 | 2.626209  |
| 16            | 9             | 0           | 1.119172                | -3.576418 | 3.923619  |
| 17            | 6             | 0           | 0.548569                | -2.118649 | 2.165397  |
| 18            | 1             | 0           | -0.041718               | -1.551914 | 2.875412  |
| 19            | 6             | 0           | 1.504713                | -2.113581 | -1.449359 |
| 20            | 6             | 0           | 0.861865                | -0.397954 | -2.930415 |
| 21            | 1             | 0           | 0.319305                | 0.531392  | -3.042139 |
| 22            | 6             | 0           | 1.552894                | -0.969946 | -3.986549 |

|    |   |   |           |           |           |
|----|---|---|-----------|-----------|-----------|
| 23 | 1 | 0 | 1.552527  | -0.488095 | -4.957463 |
| 24 | 6 | 0 | 2.233293  | -2.168633 | -3.758764 |
| 25 | 1 | 0 | 2.780049  | -2.654531 | -4.560709 |
| 26 | 6 | 0 | 2.214145  | -2.735773 | -2.492134 |
| 27 | 1 | 0 | 2.743270  | -3.655253 | -2.293007 |
| 28 | 6 | 0 | -1.882847 | -1.355061 | -0.388832 |
| 29 | 6 | 0 | -2.928602 | -1.169432 | 0.564562  |
| 30 | 6 | 0 | -4.120306 | -1.897768 | 0.406824  |
| 31 | 9 | 0 | -5.138763 | -1.733658 | 1.281384  |
| 32 | 6 | 0 | -4.322776 | -2.796642 | -0.626530 |
| 33 | 1 | 0 | -5.251599 | -3.344917 | -0.718826 |
| 34 | 6 | 0 | -3.277050 | -2.966220 | -1.528271 |
| 35 | 9 | 0 | -3.441190 | -3.835226 | -2.537538 |
| 36 | 6 | 0 | -2.075819 | -2.268912 | -1.430468 |
| 37 | 1 | 0 | -1.310284 | -2.465268 | -2.171797 |
| 38 | 6 | 0 | -2.637511 | -0.254805 | 1.665139  |
| 39 | 6 | 0 | -0.970283 | 1.123493  | 2.589769  |
| 40 | 1 | 0 | 0.035526  | 1.508885  | 2.483440  |
| 41 | 6 | 0 | -1.745721 | 1.420225  | 3.699603  |
| 42 | 1 | 0 | -1.349134 | 2.055955  | 4.483027  |
| 43 | 6 | 0 | -3.026522 | 0.866206  | 3.777090  |
| 44 | 1 | 0 | -3.667760 | 1.073365  | 4.628048  |
| 45 | 6 | 0 | -3.469725 | 0.028607  | 2.763527  |
| 46 | 1 | 0 | -4.446542 | -0.428041 | 2.814529  |
| 47 | 6 | 0 | 1.214114  | 2.614839  | 0.133900  |
| 48 | 6 | 0 | 2.309797  | 3.496174  | 0.102654  |
| 49 | 1 | 0 | 2.146416  | 4.561465  | 0.002267  |
| 50 | 6 | 0 | 3.784175  | 1.618197  | 0.257851  |
| 51 | 6 | 0 | 5.166232  | 1.028104  | 0.391216  |
| 52 | 6 | 0 | 2.663555  | 0.802405  | 0.244913  |
| 53 | 1 | 0 | 2.761757  | -0.274351 | 0.293183  |
| 54 | 6 | 0 | -0.324662 | 4.375823  | 0.948446  |
| 55 | 1 | 0 | 0.549871  | 4.559104  | 1.571213  |
| 56 | 1 | 0 | -1.172159 | 4.205751  | 1.623828  |
| 57 | 6 | 0 | -0.624290 | 5.523950  | -0.005777 |
| 58 | 1 | 0 | -0.761898 | 6.466511  | 0.531732  |
| 59 | 1 | 0 | 0.211834  | 5.659179  | -0.699928 |
| 60 | 6 | 0 | -1.904253 | 5.169475  | -0.754037 |
| 61 | 1 | 0 | -2.774891 | 5.468629  | -0.155985 |
| 62 | 1 | 0 | -1.971734 | 5.709003  | -1.707128 |
| 63 | 6 | 0 | -3.311659 | 3.393619  | -1.682302 |
| 64 | 1 | 0 | -3.331881 | 3.913664  | -2.648924 |
| 65 | 1 | 0 | -4.126108 | 3.808540  | -1.075577 |
| 66 | 6 | 0 | -3.479541 | 1.894230  | -1.884116 |
| 67 | 1 | 0 | -4.236199 | 1.711915  | -2.652776 |
| 68 | 1 | 0 | -3.817391 | 1.407093  | -0.964193 |
| 69 | 6 | 0 | -2.124191 | 1.319636  | -2.284265 |
| 70 | 1 | 0 | -2.187172 | 0.247636  | -2.464846 |
| 71 | 1 | 0 | -1.781204 | 1.798624  | -3.213826 |
| 72 | 6 | 0 | -1.112008 | 2.764309  | -0.722421 |
| 73 | 1 | 0 | 4.453968  | 3.669675  | 0.135784  |
| 74 | 9 | 0 | 6.041623  | 1.681434  | -0.397094 |
| 75 | 9 | 0 | 5.610507  | 1.127366  | 1.658652  |
| 76 | 9 | 0 | 5.180218  | -0.274315 | 0.049924  |

---

**Table S8.** Optimized Atomic coordinates obtained from DFT calculations of [2b]<sup>+</sup>

| Center Number | Atomic Number | Atomic Type | Coordinates (Angstroms) |           |           |
|---------------|---------------|-------------|-------------------------|-----------|-----------|
|               |               |             | X                       | Y         | Z         |
| 1             | 77            | 0           | -0.142633               | -0.039157 | -0.058060 |
| 2             | 7             | 0           | -1.245020               | -0.921480 | -1.598399 |
| 3             | 7             | 0           | 0.725250                | 0.981067  | 1.542126  |
| 4             | 7             | 0           | 0.672426                | -2.067490 | 0.382242  |
| 5             | 6             | 0           | 1.557221                | -4.702149 | 0.534669  |
| 6             | 7             | 0           | 2.926410                | -1.266720 | 0.275670  |
| 7             | 7             | 0           | 4.115279                | 0.265789  | -1.052353 |
| 8             | 7             | 0           | 1.764762                | 0.119142  | -1.224658 |
| 9             | 6             | 0           | -1.926250               | -0.281285 | 0.881353  |
| 10            | 6             | 0           | -2.956996               | -0.814274 | 0.047487  |
| 11            | 6             | 0           | -4.238481               | -1.000257 | 0.595802  |
| 12            | 9             | 0           | -5.238155               | -1.503857 | -0.163329 |
| 13            | 6             | 0           | -4.546564               | -0.695699 | 1.910317  |
| 14            | 1             | 0           | -5.543660               | -0.850203 | 2.302390  |
| 15            | 6             | 0           | -3.519031               | -0.183097 | 2.696227  |
| 16            | 9             | 0           | -3.788051               | 0.120215  | 3.976273  |
| 17            | 6             | 0           | -2.232153               | 0.027904  | 2.211306  |
| 18            | 1             | 0           | -1.495208               | 0.443053  | 2.888408  |
| 19            | 6             | 0           | -2.568838               | -1.151856 | -1.320918 |
| 20            | 6             | 0           | -0.743541               | -1.246387 | -2.806566 |
| 21            | 1             | 0           | 0.314261                | -1.060665 | -2.936829 |
| 22            | 6             | 0           | -1.520360               | -1.785547 | -3.819880 |
| 23            | 1             | 0           | -1.070828               | -2.024887 | -4.776728 |
| 24            | 6             | 0           | -2.877733               | -1.999227 | -3.569067 |
| 25            | 1             | 0           | -3.524021               | -2.409471 | -4.338676 |
| 26            | 6             | 0           | -3.399438               | -1.688635 | -2.320796 |
| 27            | 1             | 0           | -4.443621               | -1.855506 | -2.104122 |
| 28            | 6             | 0           | -0.707341               | 1.855249  | -0.499942 |
| 29            | 6             | 0           | -0.183106               | 2.844387  | 0.385738  |
| 30            | 6             | 0           | -0.471581               | 4.195982  | 0.130534  |
| 31            | 9             | 0           | 0.022883                | 5.161906  | 0.937887  |
| 32            | 6             | 0           | -1.251241               | 4.611939  | -0.935464 |
| 33            | 1             | 0           | -1.457813               | 5.661310  | -1.102687 |
| 34            | 6             | 0           | -1.759975               | 3.621259  | -1.769246 |
| 35            | 9             | 0           | -2.524534               | 3.994038  | -2.807805 |
| 36            | 6             | 0           | -1.503433               | 2.266879  | -1.574529 |
| 37            | 1             | 0           | -1.941064               | 1.558661  | -2.268249 |
| 38            | 6             | 0           | 0.583633                | 2.344428  | 1.523778  |
| 39            | 6             | 0           | 1.337216                | 0.383586  | 2.583909  |
| 40            | 1             | 0           | 1.370858                | -0.697667 | 2.549428  |
| 41            | 6             | 0           | 1.875063                | 1.092937  | 3.646460  |
| 42            | 1             | 0           | 2.347899                | 0.564124  | 4.466236  |
| 43            | 6             | 0           | 1.772630                | 2.486566  | 3.629505  |
| 44            | 1             | 0           | 2.180482                | 3.080582  | 4.441350  |
| 45            | 6             | 0           | 1.125867                | 3.110198  | 2.572054  |
| 46            | 1             | 0           | 1.016122                | 4.183956  | 2.550924  |
| 47            | 6             | 0           | 1.992839                | -2.334877 | 0.321907  |
| 48            | 6             | 0           | 2.456772                | -3.658617 | 0.376395  |
| 49            | 1             | 0           | 3.515073                | -3.866561 | 0.278935  |
| 50            | 6             | 0           | 0.185347                | -4.433925 | 0.627055  |
| 51            | 6             | 0           | -0.836748               | -5.524557 | 0.817269  |

|    |   |   |           |           |           |
|----|---|---|-----------|-----------|-----------|
| 52 | 6 | 0 | -0.191047 | -3.098214 | 0.524337  |
| 53 | 1 | 0 | -1.236770 | -2.818420 | 0.573545  |
| 54 | 6 | 0 | 4.170266  | -1.400623 | 1.055892  |
| 55 | 1 | 0 | 4.056934  | -2.238337 | 1.742742  |
| 56 | 1 | 0 | 4.295796  | -0.496363 | 1.664452  |
| 57 | 6 | 0 | 5.349672  | -1.571346 | 0.107226  |
| 58 | 1 | 0 | 6.287648  | -1.710221 | 0.652573  |
| 59 | 1 | 0 | 5.197007  | -2.457036 | -0.518411 |
| 60 | 6 | 0 | 5.434582  | -0.308792 | -0.743524 |
| 61 | 1 | 0 | 6.004569  | 0.459819  | -0.205135 |
| 62 | 1 | 0 | 5.965310  | -0.496937 | -1.685544 |
| 63 | 6 | 0 | 4.214690  | 1.528962  | -1.808430 |
| 64 | 1 | 0 | 4.712540  | 1.310123  | -2.762254 |
| 65 | 1 | 0 | 4.872098  | 2.207444  | -1.250295 |
| 66 | 6 | 0 | 2.850441  | 2.157475  | -2.055332 |
| 67 | 1 | 0 | 2.921691  | 2.874521  | -2.878432 |
| 68 | 1 | 0 | 2.500057  | 2.699910  | -1.171772 |
| 69 | 6 | 0 | 1.867655  | 1.034505  | -2.371709 |
| 70 | 1 | 0 | 0.875607  | 1.428692  | -2.586683 |
| 71 | 1 | 0 | 2.211259  | 0.485239  | -3.261601 |
| 72 | 6 | 0 | 2.904868  | -0.268589 | -0.705748 |
| 73 | 1 | 0 | 1.920420  | -5.725379 | 0.574448  |
| 74 | 1 | 0 | -0.767594 | -6.272111 | 0.020082  |
| 75 | 1 | 0 | -0.681658 | -6.047230 | 1.767142  |
| 76 | 1 | 0 | -1.853137 | -5.124015 | 0.817313  |

---

## Device Fabrication and Testing

The electrical and optical properties of EL devices using **1b**, **2a** and **2b** were investigated by fabricating OLEDs with the active layer deposited from solution. The device architecture is given in **Fig. 7** of the main text. The irradiance, current, and voltage of the device were measured under an ambient environment with a Keithley 2400 SourceMeter and 2000 Multimeter connected to a calibrated silicon photodiode. The electroluminescence spectrum was captured by an Andor DV420-BV CCD spectrometer. For a comparison between PL and EL, we plotted the EL spectra against energy.

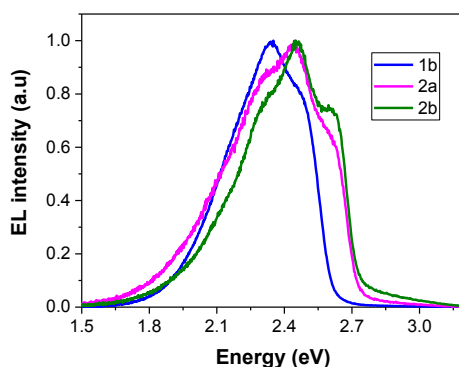

**Figure S21:** Electroluminescence spectra of complexes **1b**, **2a** and **2b**.

## References

1. G. A. Crosby and J. N. Demas, *J. Phys. Chem.*, 1971, **75**, 991-1024.

2. W. Melhuish, *J. Phys. Chem.*, 1961, **65**, 229-235.
3. Gaussian 09, Revision D.01, M. J. Frisch, G. W. Trucks, H. B. Schlegel, G. E. Scuseria, M. A. Robb, J. R. Cheeseman, G. Scalmani, V. Barone, B. Mennucci, G. A. Petersson, H. Nakatsuji, M. Caricato, X. Li, H. P. Hratchian, A. F. Izmaylov, J. Bloino, G. Zheng, J. L. Sonnenberg, M. Hada, M. Ehara, K. Toyota, R. Fukuda, J. Hasegawa, M. Ishida, T. Nakajima, Y. Honda, O. Kitao, H. Nakai, T. Vreven, J. A. Montgomery, Jr., J. E. Peralta, F. Ogliaro, M. Bearpark, J. J. Heyd, E. Brothers, K. N. Kudin, V. N. Staroverov, T. Keith, R. Kobayashi, J. Normand, K. Raghavachari, A. Rendell, J. C. Burant, S. S. Iyengar, J. Tomasi, M. Cossi, N. Rega, J. M. Millam, M. Klene, J. E. Knox, J. B. Cross, V. Bakken, C. Adamo, J. Jaramillo, R. Gomperts, R. E. Stratmann, O. Yazyev, A. J. Austin, R. Cammi, C. Pomelli, J. W. Ochterski, R. L. Martin, K. Morokuma, V. G. Zakrzewski, G. A. Voth, P. Salvador, J. J. Dannenberg, S. Dapprich, A. D. Daniels, O. Farkas, J. B. Foresman, J. V. Ortiz, J. Cioslowski, and D. J. Fox, Gaussian, Inc., Wallingford CT, 2013.
4. A. D. Becke, *J. Chem. Phys.*, 1993, **98**, 5648–5652.
5. C. Lee, W. Yang, R. G. Parr, *Phys. Rev. B: Condens. Matter*, 1988, **37**, 785–789.
6. A. D. McLean, G. S. Chandler, *J. Chem. Phys.*, 1980, **72**, 5639–5648.
7. J. S. Binkley, J. A. Pople, W. J. Hehre, *J. Am. Chem. Soc.*, 1980, **102**, 939.
8. W. R. Browne, N. M. O'Boyle, J. J. McGarvey, J. G. Vos, *Chem. Soc. Rev.*, 2005, **34**, 641–663.
9. D. A. Zhurko, G. A. Zhurko, ChemCraft 1.5; Plimus: San Diego, CA. Available at <http://www.chemcraftprog.com>.
